# Supplementary material
Source: PubMed Central journal article supplement (PMC6309032)
Supplement: DS_10.1369_0022155418778546.pdf [file DS_10.1369_0022155418778546.pdf]

## Supplemental Figure Legends

**ESM Fig. 1. CD34 and CD31 immunodetection of islet vessels.** Pancreas sections were stained for CD34 and CD31 with SCG3 using OPAL as described in Methods for 3 control donors (N=10 islets/donor). A representative islet is shown for a 27 year old female donor without diabetes (A) with each channels shown below (B-D). Image analysis showed that CD34 detected a significantly greater islet vessel area (%) than CD31 (E, paired t-test,  $p < 0.05$ )).

**ESM Fig. 2. Islet vessel parameters by donor age.** Pancreas sections were stained and image analysis performed as described in Methods for 16 control donors (N=10 islets/donor) and 17 donors with type 1 diabetes (N=7-20 islets/donor). Data are shown for control and diabetic donors with the same Y axis scale for graphs used between donor groups. Islet vessel diameter (A,D), density (B,E), and area (C,F) were not significantly correlated with age in control donors (10-27 years of age, A-C) or diabetic donors (11-29 years of age, D-F). Spearman correlation analysis,  $p > 0.05$ .

**ESM Fig. 3. Islet sampling sizes.** Islet vessel densities are shown for a representative control donor using 5 to 35 islets (A). Islet vessel densities are shown for 3 control donors and 3 diabetic donors for 10, 20, and 30 islets each donor. Mean islet vessel density (B) and diameter (C) were similar between 10-30 islets.

**ESM Fig. 4. Vessels within the peri-islet exocrine regions.** Pancreas sections were stained and image analysis performed as described in Methods for 16 control donors (N=7-8 peri-islet exocrine regions/donor) and 17 donors with type 1 diabetes (N=7-8 exocrine regions/donor). No significant differences were observed in peri-islet exocrine vessel parameters between control or diabetic donor groups (A-C). T-test,  $p > 0.05$ .

**ESM Fig. 5. Vessel diameter and density versus islet insulin area in diabetic donors.** Sections were stained and analyzed as described in Methods for 7 donors with type 1 diabetes (N= 5-11 islets/donor; each donor is color coded). Correlation analysis was performed for INS+ islet vessel diameter (A) and density (B) as a function of islet insulin area (%) in donors with type 1 diabetes. No significant differences were observed between vessel diameter (A) and density (B) compared to islet insulin area. Spearman correlation analysis,  $p > 0.05$ .

**ESM Fig. 6. Vessel diameter and density in INS+ islets with insulinitis.** Sections were stained and analyzed as described in Methods for 8 donors with type 1 diabetes. Insulitic islets were identified in 5 donors with type 1 diabetes (N= 5-6 islets of CD3+/- subtype/donor). Sections were stained for SCG3 (green), SMA (yellow), insulin (blue), and CD34 (red)(a,b) and SCG3 (green), CD3 (yellow), and insulin (blue)(c). Representative islets are shown from 3 diabetic donors for CD3- (a) and CD3+ subtypes (b, c). Red arrowheads denote CD3+ cells in islets (c). Paired lines are shown for each donor for vessel diameter (d) and density (e) by islet CD3+/- subtype. Some islets with insulinitis were included regardless of shape due to low numbers per section. No significant differences were observed by islet CD3+/- status. Paired t-test,  $p > 0.05$ .

**ESM Table 1. Type 1 diabetes donor islet and exocrine vessel parameters.** Donors are shown by donor type (No Diabetes, Type 1 Diabetes) with total islet numbers (# islets) and islet subtype numbers based on insulin and insulinitis detection as described in Methods. Islet vessel parameters and SMA area are provided in Table 1A. Exocrine vessel parameters and SMA area are provided in Table 1B. NA, not available.

| Table 1A: Islet        |          |             |             |            |                                |                                   |                                         |                 |              |
|------------------------|----------|-------------|-------------|------------|--------------------------------|-----------------------------------|-----------------------------------------|-----------------|--------------|
| CaseID                 | # Islets | # INS+ CD3- | # INS+ CD3+ | # INS-CD3- | Total area ( $\mu\text{m}^2$ ) | Vessel Diameter ( $\mu\text{m}$ ) | Vessel Density ( $10^4/\mu\text{m}^2$ ) | Vessel area (%) | SMA area (%) |
| <b>No Diabetes</b>     |          |             |             |            |                                |                                   |                                         |                 |              |
| 6057                   | 10       | 10          | 0           | 0          | 26,764                         | 7.0                               | 4.5                                     | 6.9             | 4.3          |
| 6091                   | 10       | 10          | 0           | 0          | 17,891                         | 7.1                               | 5.8                                     | 8.4             | 7.2          |
| 6099                   | 10       | 10          | 0           | 0          | 20,759                         | 6.6                               | 6.4                                     | 8.9             | 3.4          |
| 6160                   | 10       | 10          | 0           | 0          | 13,584                         | 5.5                               | 4.5                                     | 5.1             | 6.7          |
| 6179                   | 10       | 10          | 0           | 0          | 15,325                         | 8.3                               | 5.1                                     | 10.3            | 5.2          |
| 6227                   | 10       | 10          | 0           | 0          | 25,318                         | 8.4                               | 4.9                                     | 10.2            | 8.0          |
| 6232                   | 10       | 10          | 0           | 0          | 18,041                         | 7.6                               | 5.3                                     | 8.3             | 2.7          |
| 6233                   | 10       | 10          | 0           | 0          | 25,040                         | 7.4                               | 6.0                                     | 9.0             | 7.0          |
| 6238                   | 10       | 10          | 0           | 0          | 18,470                         | 9.2                               | 5.3                                     | 13.3            | 5.0          |
| 6271                   | 10       | 10          | 0           | 0          | 16,918                         | 6.8                               | 5.3                                     | 7.5             | 5.0          |
| 6279                   | 10       | 10          | 0           | 0          | 14,899                         | 8.2                               | 5.0                                     | 7.8             | 2.7          |
| 6282                   | 10       | 10          | 0           | 0          | 27,237                         | 9.4                               | 4.5                                     | 11.5            | 2.7          |
| 6317                   | 10       | 10          | 0           | 0          | 24,898                         | 7.4                               | 6.1                                     | 9.2             | 3.8          |
| 6318                   | 10       | 10          | 0           | 0          | 17,926                         | 8.1                               | 5.2                                     | 9.2             | 2.3          |
| 6333                   | 10       | 10          | 0           | 0          | 12,713                         | 8.4                               | 5.1                                     | 9.9             | 6.0          |
| 6358                   | 10       | 10          | 0           | 0          | 19,636                         | 6.0                               | 5.5                                     | 5.8             | 1.8          |
| Counts                 | 160      | 160         |             |            |                                |                                   |                                         |                 |              |
| Mean                   |          |             |             |            | 19,714                         | 7.6                               | 5.3                                     | 8.8             | 4.6          |
| SD                     |          |             |             |            | 1,193                          | 1.1                               | 0.6                                     | 2.0             | 2.0          |
| <b>Type 1 Diabetes</b> |          |             |             |            |                                |                                   |                                         |                 |              |
| 6046                   | 10       | 5           | 0           | 5          | 12,691                         | 5.7                               | 13.3                                    | 10.9            | NA           |
| 6049                   | 10       | 0           | 0           | 10         | 15,046                         | 6.0                               | 8.4                                     | 8.2             | 3.5          |
| 6064                   | 10       | 0           | 0           | 10         | 13,945                         | 6.0                               | 9.4                                     | 8.8             | 6.8          |
| 6070                   | 17       | 6           | 5           | 6          | 27,793                         | 5.9                               | 8.1                                     | 7.8             | 8.5          |
| 6083                   | 10       | 0           | 0           | 10         | 16,252                         | 5.3                               | 10.4                                    | 8.7             | 5.8          |
| 6089                   | 8        | 0           | 0           | 8          | 16,837                         | 5.8                               | 9.6                                     | 10.2            | 6.0          |
| 6195                   | 10       | 0           | 0           | 10         | 11,818                         | 6.2                               | 9.4                                     | 9.6             | 5.0          |
| 6237                   | 9        | 0           | 0           | 9          | 12,483                         | 5.4                               | 12.0                                    | 9.4             | 3.8          |
| 6243                   | 14       | 4           | 5           | 5          | 14,173                         | 6.8                               | 8.6                                     | 10.7            | 2.4          |
| 6245                   | 15       | 5           | 5           | 5          | 13,166                         | 6.6                               | 8.8                                     | 10.8            | 5.2          |
| 6264                   | 10       | 0           | 0           | 10         | 10,103                         | 6.2                               | 11.2                                    | 12.9            | 5.9          |
| 6265                   | 7        | 0           | 0           | 7          | 7,639                          | 5.9                               | 9.9                                     | 8.4             | 3.8          |
| 6321                   | 10       | 0           | 0           | 10         | 13,364                         | 5.8                               | 11.1                                    | 9.7             | 7.8          |
| 6324                   | 10       | 0           | 0           | 10         | 11,612                         | 5.2                               | 10.0                                    | 6.8             | 10.3         |
| 6325                   | 14       | 9           | 0           | 5          | 26,324                         | 7.2                               | 5.7                                     | 8.6             | 2.3          |
| 6362                   | 15       | 5           | 6           | 4          | 54,300                         | 7.1                               | 6.2                                     | 10.5            | 11.2         |
| 6396                   | 20       | 8           | 7           | 5          | 19,421                         | 8.3                               | 6.7                                     | 12.9            | 7.7          |
| Counts                 | 199      | 42          | 28          | 129        |                                |                                   |                                         |                 |              |
| Mean                   |          |             |             |            | 17,469                         | 6.2                               | 9.3                                     | 9.7             | 6.0          |
| SD                     |          |             |             |            | 2,627                          | 0.8                               | 0.2                                     | 1.7             | 2.6          |

Table 1B: Exocrine

| CaseID                 | Exocrine Area (µm <sup>2</sup> ) | SMA Area (µm <sup>2</sup> ) | SMA Area (%) | Vessel Diameter (µm) | Vessel Density (10 <sup>4</sup> /µm <sup>2</sup> ) | Vessel area (%) |
|------------------------|----------------------------------|-----------------------------|--------------|----------------------|----------------------------------------------------|-----------------|
| <b>No Diabetes</b>     |                                  |                             |              |                      |                                                    |                 |
| 6057                   | 120,422                          | 10,744                      | 8.8          | 5.6                  | 10.0                                               | 11.0            |
| 6091                   | 131,453                          | 9,524                       | 7.3          | 5.2                  | 11.5                                               | 9.6             |
| 6099                   | 128,585                          | 2,953                       | 2.3          | 5.4                  | 10.1                                               | 10.0            |
| 6160                   | 135,761                          | 7,206                       | 5.4          | 5.2                  | 8.1                                                | 6.6             |
| 6179                   | 131,807                          | 7,272                       | 5.6          | 5.8                  | 8.0                                                | 10.0            |
| 6227                   | 124,026                          | 12,118                      | 9.9          | 5.9                  | 9.4                                                | 11.4            |
| 6232                   | 131,303                          | 4,284                       | 3.3          | 5.2                  | 9.5                                                | 8.8             |
| 6233                   | 121,552                          | 3,255                       | 2.7          | 5.5                  | 9.1                                                | 8.8             |
| 6238                   | 130,874                          | 6,614                       | 5.1          | 5.3                  | 9.7                                                | 9.4             |
| 6271                   | 132,427                          | 4,391                       | 3.3          | 5.6                  | 8.5                                                | 9.8             |
| 6279                   | 128,541                          | 2,860                       | 2.3          | 5.4                  | 9.7                                                | 8.8             |
| 6282                   | 121,043                          | 4,458                       | 3.8          | 5.1                  | 11.9                                               | 11.2            |
| 6317                   | 124,446                          | 2,596                       | 2.1          | 5.6                  | 7.8                                                | 8.4             |
| 6318                   | 131,418                          | 1,589                       | 1.2          | 5.7                  | 8.8                                                | 10.1            |
| 6333                   | 120,190                          | 11,300                      | 8.6          | 5.7                  | 8.6                                                | 9.9             |
| 6358                   | 119,837                          | 4,134                       | 3.5          | 5.4                  | 9.6                                                | 9.3             |
| Counts                 | 112                              |                             |              |                      |                                                    |                 |
| Mean                   | 127,105                          | 5,956                       | 4.7          | 5.5                  | 9.4                                                | 9.6             |
| SD                     | 5,344                            | 3,288                       | 2.6          | 0.2                  | 1.1                                                | 1.1             |
| <b>Type 1 Diabetes</b> |                                  |                             |              |                      |                                                    |                 |
| 6049                   | 134,833                          | 2,431                       | 1.8          | 5.2                  | 11.3                                               | 9.2             |
| 6064                   | 120,003                          | 1,677                       | 1.4          | 5.7                  | 8.7                                                | 9.2             |
| 6083                   | 135,399                          | 4,048                       | 3.0          | 5.6                  | 10.3                                               | 10.3            |
| 6089                   | 119,365                          | 14,619                      | 12.5         | 5.8                  | 6.9                                                | 8.0             |
| 6195                   | 133,092                          | 3,428                       | 2.6          | 5.5                  | 8.7                                                | 9.1             |
| 6237                   | 132,508                          | 3,210                       | 2.5          | 5.3                  | 10.6                                               | 9.4             |
| 6264                   | 127,838                          | 3,732                       | 2.9          | 5.6                  | 9.4                                                | 9.1             |
| 6265                   | 129,484                          | 1,711                       | 1.4          | 5.6                  | 9.1                                                | 9.3             |
| 6321                   | 135,171                          | 2,453                       | 1.8          | 5.9                  | 11.2                                               | 12.9            |
| 6324                   | 114,887                          | 7,565                       | 6.9          | 5.8                  | 9.5                                                | 9.9             |
| 6046                   | 124,044                          | 4,065                       | 3.2          | 5.6                  | 8.6                                                | 8.1             |
| 6325                   | 112,603                          | 1,549                       | 1.4          | 6.0                  | 9.0                                                | 11.1            |
| 6070                   | 123,470                          | 5,057                       | 4.1          | 5.6                  | 9.8                                                | 9.9             |
| 6243                   | 133,947                          | 11,022                      | 8.2          | 5.6                  | 11.3                                               | 11.5            |
| 6245                   | 116,382                          | 6,635                       | 5.8          | 5.8                  | 8.9                                                | 11.0            |
| 6362                   | 95,044                           | 13,514                      | 15.0         | 5.8                  | 9.4                                                | 11.0            |
| 6396                   | 129,923                          | 16,733                      | 13.3         | 5.3                  | 7.9                                                | 9.0             |
| Counts                 | 119                              |                             |              |                      |                                                    |                 |
| Mean                   | 124,588                          | 6,085                       | 5.2          | 5.6                  | 9.4                                                | 9.9             |
| SD                     | 10,745                           | 4,900                       | 4.5          | 0.2                  | 1.2                                                | 1.2             |

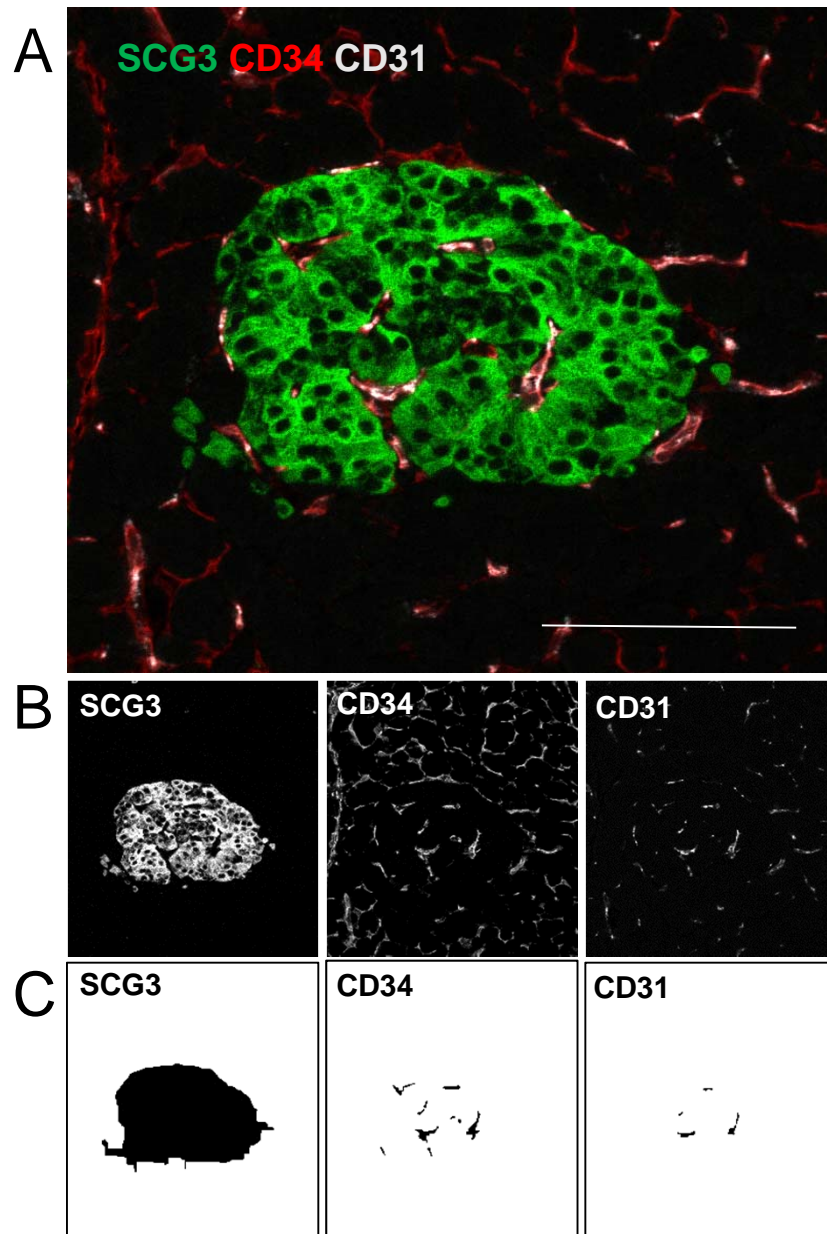

ESM Fig. 1

## Control

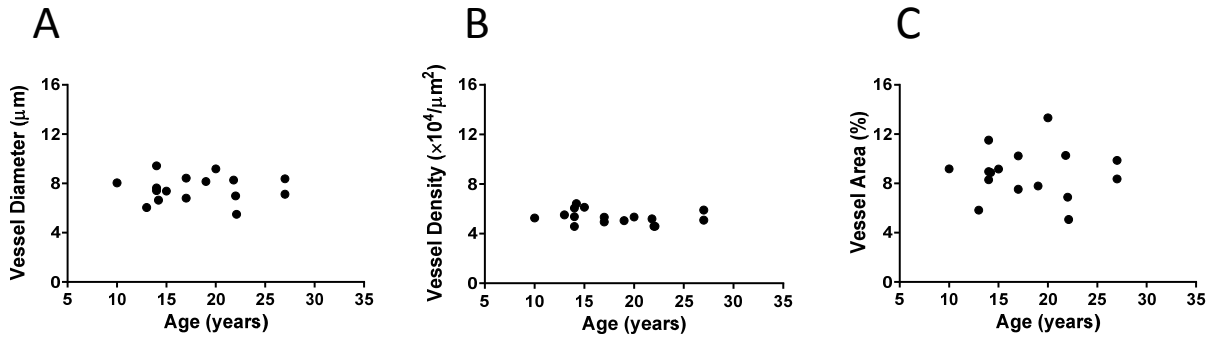

## Type 1 Diabetes

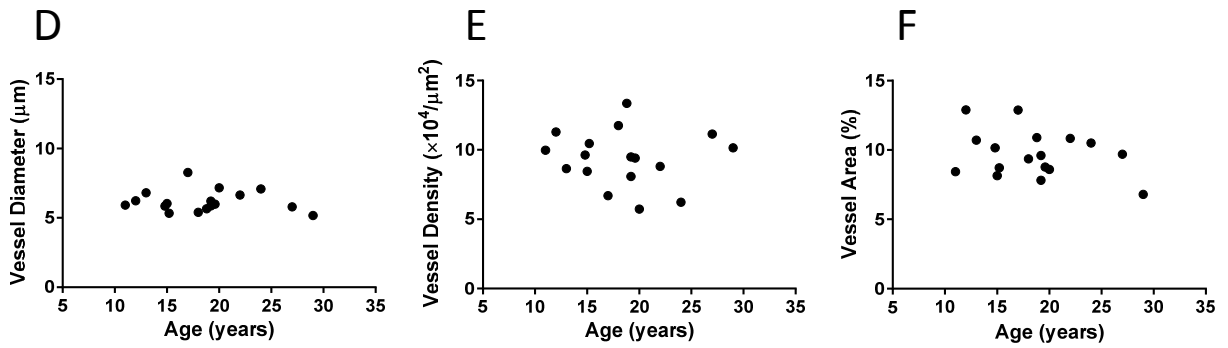

ESM Fig. 2.

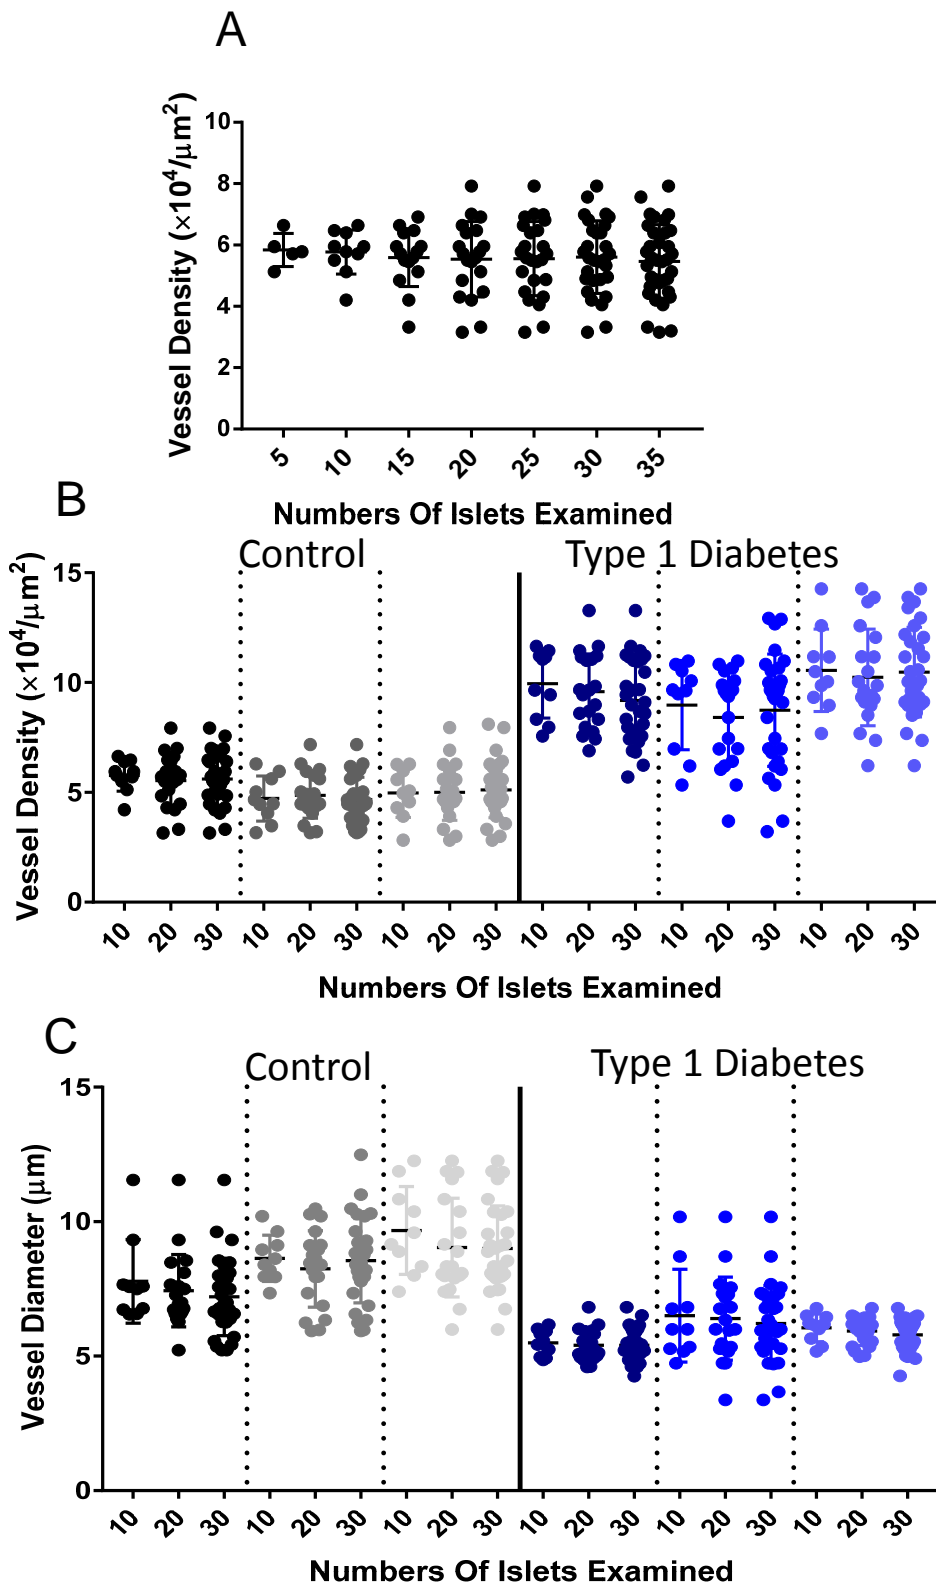

ESM Fig. 3.

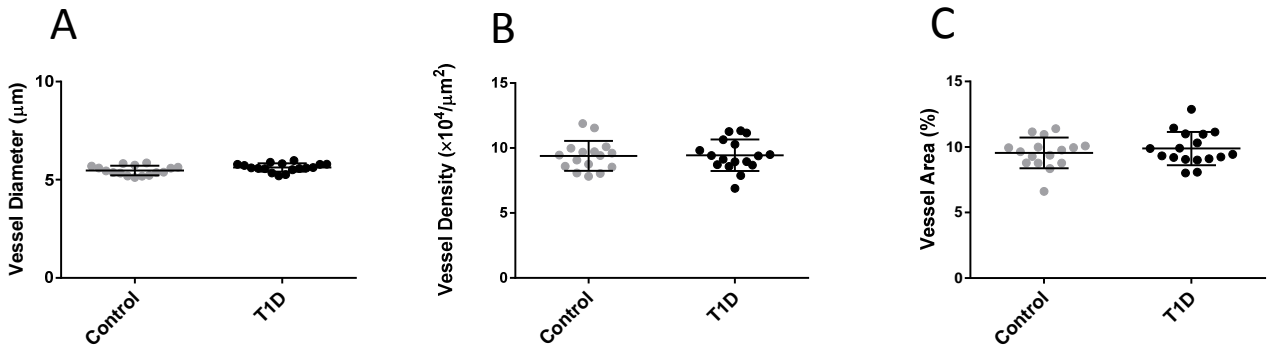

ESM Fig.4



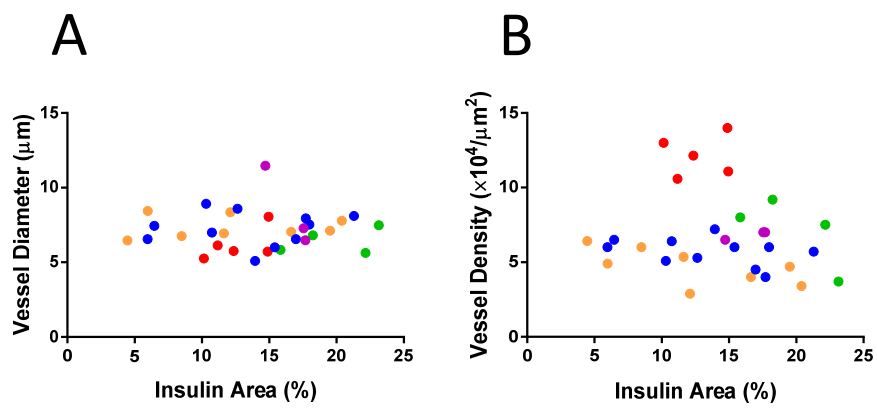

ESM Fig. 5.

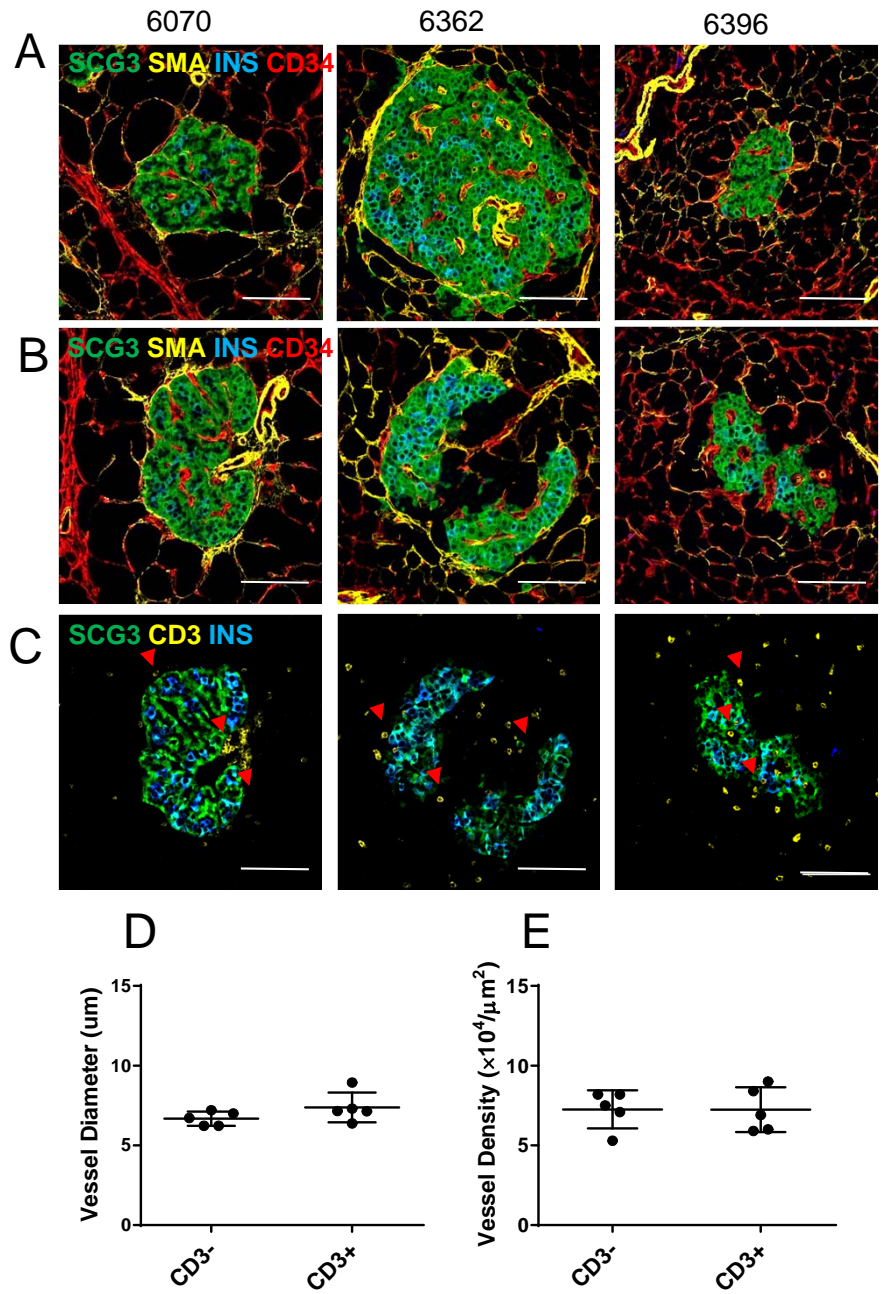

ESM Fig. 6.
